# Supplementary material
Source: Royal Society of Chemistry journal article supplement (doi:10.1039/d5em00821b)
Supplement: d5em00821b1.pdf [file d5em00821b1.pdf]

## SUPPLEMENTARY INFORMATION

### Hydroxide-Promoted Transformation of Fluorotelomer Carboxylic Acids at Ambient Temperature

Liliya Chernysheva,<sup>a</sup> Elizabeth G. Curtis,<sup>a</sup> Zunhui Lin,<sup>b</sup> and Kyle Doudrick<sup>a\*</sup>

<sup>a</sup>Department of Civil and Environmental Engineering and Earth Sciences, University of Notre Dame, Notre Dame, Indiana 46556, United States

<sup>b</sup>Ira A. Fulton Schools of Engineering, Arizona State University, Tempe, AZ 85287-3005, United States

**\*Corresponding author's emails and addresses:**

Kyle Doudrick

[kdoudrick@nd.edu](mailto:kdoudrick@nd.edu)

Department of Civil and Environmental Engineering and Earth Sciences, University of Notre Dame, Notre Dame, Indiana 46556, United States

**Revision Date:** 03/15/26

**Journal:** Environmental Science: Processes and Impacts

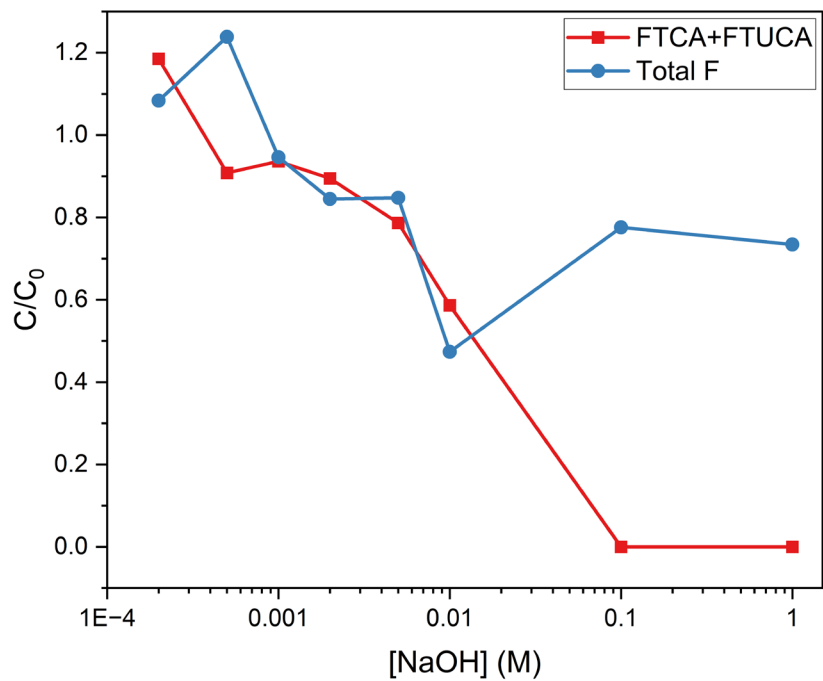

**Figure S1.** Normalized concentration of 6:2 FTCA+6:2 FTUCA and total F (measured by CIC) as a function of the NaOH concentration at equilibrium after 14 days in solution.
