# Supplementary material
Source: Royal Society of Chemistry journal article supplement (doi:10.1039/d5em00821b)
Supplement: d5em00821b2.xlsx [file d5em00821b2.xlsx]

## Sheet: Fig 1A
[NaOH]	C/C\-(0)		C/C\-(0)
M
	6:2 FTCA		6:2 FTUCA
1e-05	1	0.0588929	0.000407816	0.000815633	1.00041
3e-05	1.06747	0.122334	0.000420602	0.000841204	1.06789
0.0001	0.963173	0.167325	0.142471	0.0982351	1.10564
0.0002	0.61802	0.0553353	0.566904	0.145519	1.18492
0.0005	0.00203282	0.00406565	0.906217	0.0754466	0.908249
0.001	0	0	0.936442	0.0551803	0.936442
0.002	0	0	0.894912	0.0845693	0.894912
0.005	0	0	0.786583	0.0885885	0.786583
0.01	0	0	0.586368	0.107654	0.586368
0.1	0	0	0	0	0
1	0	0	0	0	0

## Sheet: Fig 1B
[NaOH]	C/C\-(0)		C/C\-(0)
M
	8:2 FTCA		8:2 FTUCA
1e-05	1	0.0719624	0	0
3e-05	1.01329	0.125186	0	0
0.0001	0.785337	0.13065	0.166693	0.136597
0.0002	0.484772	0.151442	0.55778	0.0503453
0.0005	0	0	0.925363	0.0379698
0.001	0	0	1.00948	0.0444503
0.002	0	0	1.03358	0.0467839
0.005	0	0	0.93813	0.0152486
0.01	0	0	0.7997	0.0178511
0.1	0	0	0	0
1	0	0	0	0

## Sheet: 62 CIC
[NaOH]	C/C\-(0)	C/C\-(0)
M
	FTCA+FTUCA	Total F
0		1
1e-05	1.00041	1.00895
3e-05	1.06789	0.404889
0.0001	1.10564	0.623485
0.0002	1.18492	1.08353
0.0005	0.90825	1.23854
0.001	0.93644	0.946273
0.002	0.89491	0.844734
0.005	0.78658	0.847721
0.01	0.58637	0.473798
0.1	0	0.776004
1	0	0.734152

## Sheet: Fig 2A
Time	Concentration		Concentration		Time	Concentration
hrs	nM		nM		hrs	nM
	6:2 FTCA		6:2 FTUCA			First-Order Model
0	520.509	60.2135	0	0	0	587.547
0.00138889	495.531	20.4492	0	0	0.1	582.231
0.00416667	624.122	48.2661	0	0	0.2	576.964
0.00833333	581.542	57.601	0	0	0.3	571.744
0.0125	611.781	68.9585	0	0	0.4	566.571
0.0166667	558.942	51.0691	0	0	0.5	561.445
0.0833333	674.846	55.4346	5.84755	0.945226	0.6	556.366
0.25	633.272	82.0203	29.0657	1.61987	0.7	551.332
0.5	548.48	100.541	62.5909	7.31021	0.8	546.345
1	554.871	76.9608	112.035	5.24067	0.9	541.402
2	461.887	37.8348	204.522	4.09122	1	536.504
4	405.832	70.1839	345.695	13.8432	2	489.895
8	289.581	18.5661	458.031	9.98495	3	447.335
18	133.791	4.57844	529.765	19.3355	4	408.473
24	40.9838	9.64314	550.436	9.78505	5	372.987
					6	340.584
					7	310.996
					8	283.978
					9	259.308
					10	236.78
					11	216.21
					12	197.427
					13	180.275
					14	164.614
					15	150.313
					16	137.255
					17	125.331
					18	114.443
					19	104.5
					20	95.422
					21	87.1322
					22	79.5626
					23	72.6506
					24	66.3391

## Sheet: Fig 2B
Time	Concentration		Concentration		Time	Concentration
hrs	nM		nM		hrs	nM
	8:2 FTCA		8:2 FTUCA			First-Order Model
0	329.511	55.1267	15.7569	0.88455	0	392.724
0.00138889	425.482	90.9844	22.6567	2.52539	0.1	374.152
0.00416667	471.083	120.909	23.4098	3.75144	0.2	356.458
0.00833333	433.999	73.7507	23.8939	0.746229	0.3	339.601
0.0125	477.248	130.784	23.1467	0.807635	0.4	323.541
0.0166667	432.037	72.5181	23.7971	2.18544	0.5	308.241
0.0833333	484.221	79.5209	31.3534	3.41793	0.6	293.664
0.25	304.436	61.4201	41.0246	4.46697	0.7	279.776
0.5	226.582	50.2396	53.0982	5.27063	0.8	266.545
1	212.861	81.9057	74.1226	5.64255	0.9	253.94
2	175.302	24.3156	118.213	2.31295	1	241.931
4	110.418	28.9943	206.694	19.6779	2	149.038
8	8.51244	20.907	280.623	17.7494	3	91.8125
18			347.341	19.2269	4	56.5596
24			357.211	34.2532	5	34.8427
					6	21.4643
					7	13.2227
					8	8.14565
					9	5.018
					10	3.09126
					11	1.90432
					12	1.17313
					13	0.722686
					14	0.445199
					15	0.274258
					16	0.168952
					17	0.10408
					18	0.0641171
					19	0.0394983
					20	0.0243323
					21	0.0149895
					22	0.00923406
					23	0.0056885
					24	0.00350431

## Sheet: Fig 3
Time	Concentration	Concentration	Time	Concentration
hrs	nM	nM	hrs	nM
	6:2 FTCA	6:2 FTUCA		First-Order Model
0	743.912	0	0	673.394
0.00833333	581.472	0.933236	1	663.331
0.0166667	631.123	1.02934	2	653.418
0.0833333	641.554	0.392168	4	634.034
0.25	804.581	1.75223	6	615.225
0.5	634.979	5.93894	8	596.974
1	663.248	4.63842	10	579.264
2	647.264	9.90736	12	562.08
4	564.338	21.4212	14	545.406
8	554.766	30.083	16	529.226
12	512.208	48.7219	18	513.526
16	535.112	63.5462	20	498.292
20	539.327	79.004	22	483.51
24	491.63	85.8461	24	469.167
			26	455.249
			28	441.744
			30	428.639
			32	415.923
			34	403.585
			36	391.612
			38	379.995
			40	368.722
			42	357.784
			44	347.17
			46	336.871
			48	326.878

## Sheet: Fig 4
Cleaning Agent	Concentration	Concentration	C/C\-(0)	C/C\-(0)
(%v/v)	nM	nM
	6:2 FTCA	6:2 FTUCA	6:2 FTCA	6:2 FTUCA
0	144.605	4.62513	1	0.0319845
0.001	100.843	34.1383	0.697369	0.236079
0.02	52.9587	66.428	0.366229	0.459374
0.05	31.4479	39.5964	0.217474	0.273824
0.1	45.8135	26.2336	0.316817	0.181415
0.2	0	19.2321	0	0.132997
0.5	0	9.13565	0	0.0631764
